# Supplementary material for: The accuracy of diagnostic ultrasound imaging for musculoskeletal soft tissue pathology of the extremities: a comprehensive review of the literature
Source: PubMed Central journal article supplement (PMC4634582; doi:10.1186/s12998-015-0076-5), 2015-11-05
Supplement: 12998_2015_76_MOESM1_ESM.pdf [file 12998_2015_76_MOESM1_ESM.pdf]

### Additional file 1 Search Terms

| <b>Search Terms<br/>Index test</b> | <b>Search Terms<br/>Diagnostic Accuracy</b>            | <b>Search Terms<br/>Target Condition/Region</b>                                                                                                                                                                                                                                                                                                                                                                                 |
|------------------------------------|--------------------------------------------------------|---------------------------------------------------------------------------------------------------------------------------------------------------------------------------------------------------------------------------------------------------------------------------------------------------------------------------------------------------------------------------------------------------------------------------------|
| Ultrasonography<br>(MeSH Term)     | Sensitivity and Specificity<br>(MeSH Term)<br>Accuracy | Shoulder (MeSH Term)<br>Elbow Joint (MeSH Term)<br>Wrist Joint (MeSH Term)<br>Hand (MeSH Term)<br>Hip (MeSH Term)<br>Knee Joint (MeSH Term)<br>Ankle Joint (MeSH Term)<br>Foot (MeSH Term)<br>Tendons (MeSH Term)<br>Ligaments (MeSH Term)<br>Muscles (MeSH Term)<br>Soft Tissue Injuries (MeSH<br>Term)<br>Nerve Compression<br>Syndromes (MeSH Term)<br>Tendinopathy (MeSH Term)<br>Tears (MeSH Term)<br>Bursitis (MeSH Term) |

Example:

- 1) ((ultrasonography) AND (sensitivity and specificity)) AND shoulder
- 2) ((ultrasonography) AND accuracy) AND shoulder

The example shown above was repeated with each target condition/region.
